# Identifying the Neural Correlates of Balance Deficits in Traumatic Brain Injury using the Partial Least Squares Correlation (PLSC) analysis

1 Vikram Shenoy Handiru<sup>1,2</sup>, Easter S. Suviseshamuthu<sup>1,2</sup>, Soha Saleh<sup>1,2</sup>, Guang H. Yue<sup>1,2</sup>, Didier  
2 Alexandre<sup>1,2</sup>

3 <sup>1</sup>Center for Mobility and Rehabilitation Engineering Research, Kessler Foundation, New Jersey,  
4 USA. <sup>2</sup>Department of Physical Medicine and Rehabilitation, Rutgers University-New Jersey Medical School,  
5 Newark, USA.

6 Correspondence should be addressed to Vikram S. Handiru; [vshenoy@kesslerfoundation.org](mailto:vshenoy@kesslerfoundation.org)

## 7 **Abstract**

8 Balance impairment or the loss of balance control is one of the most debilitating consequences of Traumatic  
9 Brain Injury (TBI). The levels of balance impairment may not be necessarily associated with the severity  
10 level of TBI, which makes it more difficult to do the correlational analysis of the balance impairment and  
11 its neural underpinnings. Therefore, we conducted a study where we collected the neurophysiological data  
12 (EEG and EMG) during a balance control task on a computerized posturography platform in a group of 17  
13 TBIs and 15 age-matched healthy controls. Further, to distinguish balance-impaired TBIs (BI-TBI) from  
14 non-impaired TBIs (BN-TBI), we stratified the level of balance impairment using the Berg Balance Scale,  
15 a functional outcome measure widely used in both research and clinical settings. We computed the brain  
16 functional connectivity features between different cortical regions of interest using the imaginary part of  
17 coherence in different frequency bands. These features are then studied in a mean-centered Partial Least  
18 Squares Correlation analysis, which is a data-driven framework with the advantage of handling more features  
19 than the number of samples, thus making it suitable for a small-sample study. Based on the nonparametric  
20 significance testing using permutation and bootstrap procedure, we noticed that theta-band connectivity  
21 strength in the following ROIs significantly contributed to distinguishing balance impaired from non-impaired  
22 population: left middle frontal gyrus, right precuneus, right precentral gyrus, bilateral middle occipital gyrus,  
23 right middle temporal gyrus, left superior frontal gyrus, left post-central gyrus, right paracentral lobule.  
24 The knowledge of specific neural regions associated with balance impairment helps better understand neural  
25 mechanisms of TBI-associated balance dysfunction and may guide the development of novel therapeutic  
26 strategies, including targeted noninvasive brain stimulation. Our future studies will investigate the effects  
27 of balance platform training on sensorimotor connectivity.

28

## 29 1. Introduction

30 Traumatic Brain Injury (TBI) is one of the leading causes of death and disability across the globe <sup>1</sup>. With  
31 the immediate consequences of long-term disability due to the injury, TBI patients are often at elevated risks  
32 of impaired motor functions such as loss of postural control <sup>2</sup>. While it is postulated that the postural imbalance  
33 could be attributed to the loss of sensorimotor integration after injury <sup>3</sup>, the exact neurophysiological  
34 mechanisms are unknown <sup>4</sup>.

35 With the advances in the current neuroimaging technologies such as high-density electroencephalography and  
36 functional Near-Infrared Spectroscopy (fNIRS), mobile imaging of body-brain behavior is possible. Although  
37 there are some studies evaluating balance-related brain functional connectivity changes in healthy individuals  
38 using fNIRS <sup>5</sup> and EEG <sup>6</sup>, there are hardly any such studies in TBI populations. The current state-of-the-art  
39 in understanding neuroanatomy and neurophysiology is limited to the findings from structural imaging using  
40 Diffusion Tensor Imaging (DTI) <sup>7,8</sup> and resting-state functional Magnetic Resonance Imaging (rs-fMRI) <sup>9</sup>.  
41 This motivated us to fill the knowledge void of the underlying neural substrates of postural control in TBI.  
42 Identifying the neural markers of postural control can potentially guide us in developing novel therapeutic  
43 strategies to address the postural instability in TBI.

44 This brings us to some of the key research questions:

- 45 1. *Why do some TBIs have more balance impairment than others?*
- 46 2. *Which brain regions and networks play a crucial role in balance control?*
- 47 3. *How does the TBI alters the modulation of motor-related functional networks during the postural control*  
48 *task?*
- 49 4. *Can we identify a diagnostic neural marker of balance deficits in TBI?*

50 Addressing these questions requires stratifying the brain injury population into balance-impaired and balance  
51 non-impaired as not every TBI patient suffers from the same degree of postural instability. Moreover, the  
52 heterogeneity in the type of brain injury adds to the challenges of neural data processing. This motivates us  
53 to study the brain dynamics in balance-impaired as well as balance non-impaired populations in comparison  
54 with the healthy controls.

55 While it is widely accepted that the external sensory cues trigger the shift of attention away from the ongoing  
56 balance task-irrelevant cognitive activity towards the balance task-relevant cognitive activity during postural  
57 control <sup>10</sup>, the interaction between different networks is not well understood. We hypothesize that a relatively  
58 complex task of postural control when faced with external perturbation cues, requires the involvement of  
59 multiple networks. Our research motivation is further fuelled by the paucity of literature on the interacting  
60 effects of different brain networks pertaining to anticipatory postural control. To this end, not only are we  
61 interested in studying the network-level mechanisms of postural control but also in exploring the individual  
62 connectivity features associated with the balance impairment in a hypothesis-driven approach by defining  
63 the regions of interest (ROI).

64 In a resting-state fMRI study focused on the functional connectivity alterations within- and between networks  
65 in the TBI population, it was observed that the Default Mode Network (DMN) showed reductions in within-  
66 network and also between-network connections with the Dorsal Attention Network (DAN) when compared  
67 to healthy controls <sup>9</sup>. The authors state that these pronounced disruptions in between-network connectivity  
68 in chronic TBI would have been missed if the integrity of only a single network was evaluated. Motivated by  
69 this idea, we want to further study how TBI affects the task-specific cognitive-motor related network during  
70 the postural control which has not been previously explored.

71 Intuitively, some of the approaches that seem to address this question look at the correlation between the  
 72 brain activity/functional networks in the brain and a quantifiable functional measure of balance deficits.  
 73 To this end, Partial Least Squares (PLS)-based approach is a powerful and robust statistical method used  
 74 to find a fundamental relationship between a large set of variables, which has been recently explored and  
 75 useful in identifying the brain-behavior association. Using this approach, Churchill et al. <sup>11</sup> observed higher  
 76 connectivity between the default-mode and sensorimotor network to be associated with sport-related concus-  
 77 sion and balance symptom severity. Extending further in this direction, we are using this data-driven PLS  
 78 method (Fig. 1) to extract neural markers of balance impairment in chronic TBI.

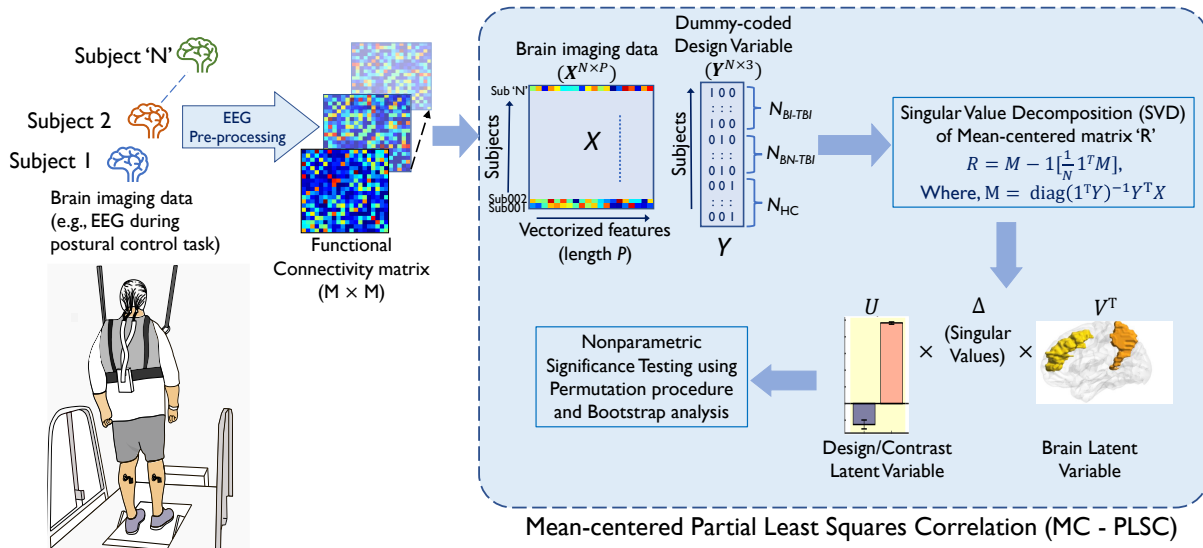

Figure 1: The mean-centered Partial Least Squares correlation (MC-PLSC) analysis framework begins with the vectorized functional connectivity features derived from preprocessed source-localized EEG. The mean-centered vectorized features for each subject as a row vector constitute a matrix (X) for N subjects. The product of the design matrix (Y) and brain imaging feature matrix (X) is then subjected to Singular Value Decomposition (SVD) which results in a set of mutually orthogonal latent variables (LVs). Left singular vector corresponds to the design/contrast LV (e.g., HC vs. TBI) whereas the right singular value corresponds to the brain LV which indicates the functional connectivity pattern associated with the contrast.

## 79 2 Methodology

### 80 2.1 Participant Characteristics

81 This study enrolled 18 individuals with a chronic Traumatic Brain Injury (TBI) and 18 Age-matched healthy  
 82 controls (HC). Due to the highly noisy EEG data of some participants, we had to exclude the data from 1  
 83 TBI and 3 HC subjects, thus we present the data from 17 TBI and 15 HC in this paper. More information  
 84 on the subject demographics including the inclusion and exclusion criteria for the study participants can be  
 85 found in <sup>12</sup>. To identify a neural marker of balance deficit within the TBI population, we dichotomized the  
 86 TBI group into balance-impaired (BI-TBI) vs. balance non-impaired TBI (BN-TBI) based on the threshold  
 87 for Berg Balance Scale (BBS) score. A BBS threshold score of 49 (out of the maximum 56 points) was chosen  
 88 to define balance impairment as it was shown to optimally identify individuals with balance deficits during  
 89 ambulation in terms of needing a walking aid <sup>13</sup>. Using this stratification based on the BBS threshold, we

Table 1: TBI Patient Demographics and Clinical Characteristics (N = 17)

| Subj_ID | Group  | Gender | Age | Height (cm) | Weight (kg) | COP (cm) | BBS | Severity        |
|---------|--------|--------|-----|-------------|-------------|----------|-----|-----------------|
| ABI001  | BI-TBI | M      | 51  | 190.5       | 95.3        | 9.39     | 48  | Severe          |
| ABI002  | BI-TBI | M      | 58  | 182.9       | 88          | 7.31     | 42  | Severe          |
| ABI003  | BI-TBI | M      | 60  | 175.9       | 88.7        | 19.18    | 44  | Severe          |
| ABI004  | BI-TBI | M      | 59  | 178.4       | 143.8       | 13.49    | 49  | Severe          |
| ABI005  | BN-TBI | M      | 51  | 180.3       | 113.9       | 9.47     | 54  | Mild            |
| ABI006  | BN-TBI | M      | 52  | 177.8       | 97.5        | 12.86    | 54  | Severe          |
| ABI007  | BN-TBI | F      | 53  | 170.2       | 76.2        | 18.0     | 51  | Mild            |
| ABI008  | BI-TBI | M      | 60  | 180.3       | 111.1       | 8.19     | 48  | Mild            |
| ABI009  | BN-TBI | F      | 32  | 167.6       | 58.5        | 10.12    | 56  | Mild            |
| ABI010  | BI-TBI | M      | 49  | 172.7       | 66.7        | 14.14    | 46  | Mild            |
| ABI012  | BN-TBI | F      | 56  | 168.9       | 120.2       | 4.8      | 55  | Mild            |
| ABI013  | BI-TBI | F      | 60  | 154.3       | 72.6        | 17.27    | 34  | Moderate        |
| ABI016  | BN-TBI | M      | 56  | 182.9       | 86.2        | 7.32     | 56  | Mild            |
| ABI018  | BI-TBI | M      | 35  | 182.9       | 68          | 15.33    | 44  | Moderate/severe |
| ABI019  | BN-TBI | M      | 23  | 177.8       | 63.5        | 7.44     | 55  | Severe          |
| ABI020  | BN-TBI | M      | 50  | 187.96      | 102.1       | 9.17     | 55  | Moderate/severe |
| ABI021  | BN-TBI | M      | 23  | 182.88      | 89.4        | 14.54    | 52  | Moderate/severe |

90 obtained the subgroup sample of BN-TBI ( $N = 9$ ) and BI-TBI ( $N = 8$ ) (Fig. 2B). The patient demographics  
91 and clinical characteristics of TBI participants are presented in Table 1.

## 92 2.2 Data Acquisition and Pre-processing

93 We used multiple modalities to collect EEG and the posturography platform data during a balance pertur-  
94 bation task and MRI to obtain subject-specific anatomical data for EEG source localization.

95 (A) **MRI Data Acquisition:** The MRI data (T1-weighted MPRAGE scan) was acquired at the Rocco  
96 Ortenzio Neuroimaging Center (Kessler Foundation, NJ) using the Siemens Skyra 3T scanner (Erlangen,  
97 Germany) with the following specifications: 1-mm isotropic voxel resolution, TE=3 ms, TR=2300 ms, 1-mm  
98 thick 176 slices, Field of View (FOV) 256x256 mm<sup>2</sup>.

99 (B) **Posturography Data Acquisition:** The perturbation-related data was measured using the computer-  
100 ized dynamic posturography (CDP) platform (NeuroCom Balance Master, NeuroCom Intl, Clackamas OR).  
101 This computerized platform was pre-programmed to generate unpredictable sinusoidal perturbations at low  
102 amplitude (0.5 cm) or high amplitude (2 cm) in the anterior-posterior (or forward and backward) direction  
103 at 0.5Hz for 4s with a random intertrial interval between 4-8s. The posturography data were collected in  
104 5 blocks where each block consisted of 20 trials randomly sorted among a 2 x 2 combination of High/Low  
105 amplitude and Forward/Backward perturbations. In this study, we mainly present the findings from a total  
106 of 29 trials of high amplitude backward perturbation, the most challenging condition with the highest range  
107 of body sway across subjects. The center of pressure (COP) time-series data from the balance platform  
108 was collected at 200 Hz, and offline low-pass filtered (10Hz), epoched, and mean-centered (zero-mean), and  
109 averaged across trials and conditions for each subject. The COP displacement was calculated as the trial  
110 average (in cm) of the cumulative distance traveled by the COP vector for the first 2s of the perturbation  
111 in the forward/backward direction.

112 (C) **EEG Data Acquisition:** The brain activities during the balance perturbation were noninvasively  
113 recorded using the 64-channel EEG system (ActiCAP BrainAmp standard, Brain Products®), Munich,  
114 Germany) at a sampling rate of 500 Hz. The EEG electrodes were positioned according to the extended

115 10-10 montage with the electrodes FCz serving as the common reference and AFz the ground.

## 116 2.3 Data Processing

117 The recorded EEG was processed offline using EEGLAB and BrainStorm toolboxes. First, we preprocessed  
118 the raw continuous EEG by downsampling it into 250 Hz followed by band-pass filtering between 1Hz and  
119 50Hz using a Butterworth filter (4th order) to ensure the frequency bands of interest are covered. The  
120 electrical line noise was removed using the Cleanline plugin for EEGLAB. Thereafter, the noisy bursts  
121 in the continuous EEG were corrected using Artifact Subspace Reconstruction. The burst detection criteria  
122 threshold ( $k$  in the ASR algorithm) was set at 20 based on the comprehensive evaluation by <sup>14</sup>. After applying  
123 the common-average referencing to the ASR-corrected data, we ran the Independent Component Analysis  
124 (ICA) (extended Infomax algorithm)<sup>15</sup>. The independent components resulting from ICA decomposition  
125 were then classified into one of the following labels ((1) Brain, (2) Muscle, (3) Eye, (4) Line noise, (5)  
126 Channel noise, (6) Heart or (7) 'other') using a machine-learning tool ICLabel plugin within EEGLAB <sup>16</sup>.  
127 The dipole fitting was done using the DIPFIT tool in EEGLAB which can be used to assess whether the  
128 dipoles corresponding to the ICs are 'brain'-based or not.

129 We retained only those ICs that are classified as 'Brain' (posterior probability  $> 0.5$ ) and the residual variance  
130 (relative to the scalp topography) of 20%. Upon selecting these ICs, the back-projected sensor-space EEG  
131 was used for EEG Source Localization.

## 132 2.4 EEG Source Localization (ESL)

133 Since the brain activity recorded at the scalp level gets attenuated due to the volume conduction effect  
134 (propagation of electric current flow through different layers of the brain and skull), it is advisable to estimate  
135 the cortical source activity <sup>17</sup>. To achieve this, we used the OpenMEEG tool <sup>18</sup> in the Brainstorm toolbox <sup>19</sup>  
136 to compute the forward head model wherein a realistic head model made of 4 layers (brain, inner skull, outer  
137 skull, and scalp surface) is reconstructed using individual T1 MRI scans and the 3D EEG electrode positions  
138 using Brainsight Neuronavigation System (Rogue Research, Montreal, Canada). The volume conduction  
139 effect is realized using the Boundary Element Model <sup>20</sup>. Once the forward model is obtained, we used  
140 sLORETA <sup>21</sup> algorithm as a distributed source model to solve the ill-posed inverse problem. Estimating  
141 the solution using sLORETA requires the computation of the noise covariance matrix in addition to the  
142 forward head model. Therefore, the noise covariance estimation was done using the 'baseline' EEG which is  
143 essentially the pre-perturbation period (-1s to 0s). Once we obtained the source-localized EEG, we parcellated  
144 the cortical surface into 66 anatomical regions using a surface-volume registration tool in BrainSuite software  
145 <sup>22</sup>. Thereafter, the key regions of interest for further analyses (functional connectivity estimation and the  
146 partial least squares analysis) were determined based on the literature and our preliminary study <sup>12</sup> in which  
147 we identified which cortical regions were significantly more activated during the perturbation compared to  
148 the baseline period. To avoid any bias concerning the hemispheric dominance, we included bilateral ROIs  
149 from the middle frontal gyrus, superior frontal gyrus, middle temporal gyrus, paracentral lobule, precentral  
150 gyrus, postcentral gyrus, precuneus, cingulate gyrus, superior parietal lobule, and middle occipital gyrus.

## 151 2.5 Functional Connectivity

152 The brain functional connectivity between two regions of interest was calculated for the time segments (0s-  
153 2s) corresponding to the perturbation task and baseline state using imaginary coherence (iCOH) <sup>23</sup>. Here,  
154 the time instant at which perturbation occurs is noted as  $t = 0s$ . The imaginary coherence is considered  
155 to be a robust estimate of phase synchronization between two time-series data. To ensure computational  
156 tractability, we measured the iCOH between the 'seed' voxels of different ROIs instead of every pair of voxels  
157 in an ROI. Mathematically, we denote the iCOH as the imaginary part of coherence i.e.,  $\text{Im}(\underline{\mathbf{I}})$  with ,  
158 where,  $\underline{\mathbf{I}} \in \mathbb{C}^{U \times U \times V}$  is a three-way tensor, where  $U$  and  $V$  are the number of ROIs and frequency bins  
159 of interest, respectively. Since the iCOH values are computed for each frequency bin, we averaged the iCOH

160 values corresponding to the frequency bins within each frequency band ( $\theta = 4 - 8Hz, \alpha = 8 - 13Hz, \beta =$   
161  $13 - 30Hz$ ). We also obtained the Weighted Node Degree (or Node Strength) for a given ROI by summing  
162 the  $\Gamma$  values of all its connections. In the context of graph theory, Weighted Node Degree is one of the  
163 simplest and the most intuitive local network measures to evaluate the contribution of a given node (or an  
164 ROI) to the connectivity network.

## 165 2.6 Mean-centered Partial Least Squares Correlation (MC-PLSC)

166 Partial Least Squares Correlation (PLSC) for neuroimaging applications was introduced by McIntosh <sup>24</sup>.  
167 PLSC algorithm is a multivariate technique that is used to explore the statistical association between two  
168 sets of variables. Depending on the research question, we can choose one of the variants of PLSC such  
169 as behavior PLSC (brain- and behavior measures as two different variables), task PLSC (brain measures  
170 corresponding to two different conditions/tasks such as attention vs. rest), or seed PLSC (to analyze the  
171 functional connectivity in a particular ‘seed’ or a brain region of interest) <sup>25</sup>. PLS algorithm has an inherent  
172 advantage of dealing with more variables ( $P$ ) than the number of observations (or samples  $N$ ) which is  
173 suitable for most neuroimaging studies. In this study, we used the Mean-Centered task PLSC (called MC-  
174 PLSC henceforth), which is conceptually very similar to Barycentric Discriminant Analysis (BADA) <sup>26</sup> in the  
175 sense MC-PLSC allows us to find sets of features (brain measures) that best maximize the absolute differences  
176 between the groups. In MC-PLSC, group labels are used as the dummy coded categorical variables (instead  
177 of the continuous behavioral measure in the case of Behavioral PLSC). To know more about the intricacies  
178 of different forms of PLSC, we recommend a review article by <sup>25</sup>.

179 To briefly explain the procedure of mean-centered PLSC, one can consider the brain measure matrix  $\mathbf{X} \in$   
180  $\mathbb{R}^{N \times P}$  and the dummy coded matrix  $\mathbf{Y} \in \mathbb{R}^{N \times m}$ , where ‘ $m$ ’ - the number of columns corresponds to the  
181 number of groups. Here, the number of columns in  $\mathbf{X}$  (i.e.  $P$ ) corresponds to the number of features derived  
182 from the brain imaging (e.g. functional connectivity/structural connectivity/power-spectrum density values,  
183 etc.). The number of rows in both  $\mathbf{X}$  and  $\mathbf{Y}$  corresponds to the number of subjects  $N$ . In this study, we  
184 used the weighted node degree values corresponding to 20 ROIs as our brain imaging variables, and also  
185 in secondary analysis, we used the functional connectivity values between 20 ROIs (a vector of  ${}^{20}C_2 = 190$   
186 connections per subject) as brain imaging variables. After standardizing the  $\mathbf{X}$  using z-score normalization,  
187 we define a matrix  $\mathbf{M}$  such that  $\mathbf{M} = \text{diag}(\mathbf{1}^T \mathbf{Y})^{-1} \mathbf{Y}^T \mathbf{X}$ , where  $\mathbf{1}$  is a  $N \times 1$  vector of 1s. This matrix  
188 scales the  $\mathbf{X}$  according to the mass of  $\mathbf{X}$  (the values are scaled such that the sum of the masses is equal to  
189 one). Thereafter, the mean-centered matrix is computed as  $\mathbf{R}_{mean-centered} = \mathbf{M} - \mathbf{1}[\frac{1}{N} \mathbf{1}^T \mathbf{M}]$ , where  $\mathbf{1}$  is a  
190  $N$ -length vector of 1s <sup>25</sup>.

191  $\mathbf{R}$  is then subjected to the singular value decomposition as  $\mathbf{R} = \mathbf{U} \mathbf{\Delta} \mathbf{V}^T$  where  $\mathbf{U}$  and  $\mathbf{V}$  are matrices  
192 composed of left and right singular column vectors ( $\mathbf{u}_k$  and  $\mathbf{v}_k$ ) and  $\mathbf{\Delta}$  a diagonal matrix of singular va-  
193 lues ( $\delta_k$ ),  $k$  being the number of latent variables corresponding to the number of groups ( $k = 3$  in our  
194 study). In the context of our PLSC study,  $\mathbf{U}$  and  $\mathbf{V}$  are termed design/group salience and brain salience  
195 reflecting the group contrast and weighted contribution by the brain functional connectivity features respec-  
196 tively. Furthermore, the projection of  $\mathbf{Y}$  and  $\mathbf{X}$  onto these salience matrices ( $\mathbf{U}$  and  $\mathbf{V}$ ) reflects the design  
197 scores (i.e.  $\mathbf{L}_Y = \mathbf{YU}$ ) and brain scores ( $\mathbf{L}_X = \mathbf{XV}$ ) respectively. The mean-centered PLSC effectively  
198 decomposes  $\mathbf{R}$  into  $k$  components that optimally separate the groups by finding pairs of group/design and  
199 brain latent vectors with maximal covariance.

200 To assess the statistical significance of the PLSC models, we ran non-parametric permutation testing, whe-  
201 rein, each latent variable (LV) is tested for its significance. In this procedure, the brain imaging features  
202 are randomly shuffled 1000 times and the latent variables are computed using PLSC every time. This way,  
203 the original relationship between brain imaging ( $\mathbf{X}$ ) and group label data ( $\mathbf{Y}$ ) is no longer valid. The latent  
204 variable  $k$  is considered significant if the empirical singular value ( $\delta_k$ ) is higher than 95% of the values ob-  
205 tained from the null distribution. Provided the latent variable is significant, we tested which of the loading  
206 weights ( $\mathbf{v}_{k,i}$ ) are robust/stable amongst the brain connectivity features. For this, we conducted a bootstrap  
207 procedure wherein, the rows of the  $\mathbf{X}$  and  $\mathbf{Y}$  were sampled with replacement. Since the permutation and



208 bootstrapping procedure can affect the alignment(rotation) of the LVs, we applied Procrustes rotation to  
209 these LVs so that they correspond to the original data <sup>27</sup>.

210 **Confidence Intervals:** To test whether the separation between groups was significant, we used generalized  
211 Principal Component Analysis to project the factor scores <sup>26</sup>. The factor scores were obtained as the product  
212 of the left singular vector and singular values, i.e.,  $F = \mathbf{U}\mathbf{\Delta}$ . These factor scores were then projected onto a  
213 2-dimensional map. 95% confidence interval of these factor scores was obtained using bootstrapped sampling,  
214 where the factor scores were obtained for every sampling. Fig. 3(c) and Fig. 4(c) shows the 95% confidence  
215 ellipses for each group on the 2-dimensional map.

## 216 3 Results

### 217 3.1 Univariate Analysis of Behavioral Measures

218 This study compared the behavioral measures based on COP displacement during High backward pertur-  
219 bation and Berg Balance Scale (BBS). While the COP displacement measures the ability to dynamically  
220 maintain balance in response to balance perturbation, BBS is a measure of static and dynamic functional  
221 balance and thus provides complementary information <sup>28</sup>. A univariate analysis based on a two-tailed t-test  
222 revealed that the TBI patients (mean  $\pm$  SD =  $11.64 \pm 4.28$ , 95% CI = [4.79, 19.18]) showed significantly  
223 larger COP displacement ( $t = 3.07$ ,  $p = 0.004$ , cohen's D = 1.09) than HC( mean  $\pm$  SD =  $7.82 \pm 2.33$ ,  
224 95% CI = [4.7, 13.13]). These results are previously presented in <sup>29</sup>. In this study, we further looked into the  
225 stratified analysis of COP displacement (shown in Fig. 2) by comparing the balance-impaired TBI (BI-TBI)  
226 and balance nonimpaired TBI (BN-TBI). The difference in COP displacement between BI-TBI ( $13.04 \pm$   
227  $4.34$ ) and BN-TBI ( $10.41 \pm 4.1$ ) was not significant as revealed by the two-tailed t-test ( $t = 1.28$ ,  $p = 0.22$ ).  
228 The BBS comparison showed a significant difference ( $t = 5.7$ ,  $p = 10e-5$ ) between BI-TBI (mean  $\pm$  SD =  
229  $44.37 \pm 4.84$ ) and BN-TBI (mean  $\pm$  SD =  $54.22 \pm 1.72$ ). Since the BBS data in HC was non-normal, we  
230 used the nonparametric Wilcoxon Ranksum test to compare the BBS in HC (median = 56, range = [55,56])  
231 with that of BI-TBI and BN-TBI. As expected, when compared to HC, both BI-TBI and BN-TBI showed a  
232 significantly lower BBS ( $z = 4.15$ ,  $p = 10e-5$  and  $z = 4.15$  and  $p = 0.0023$  respectively).

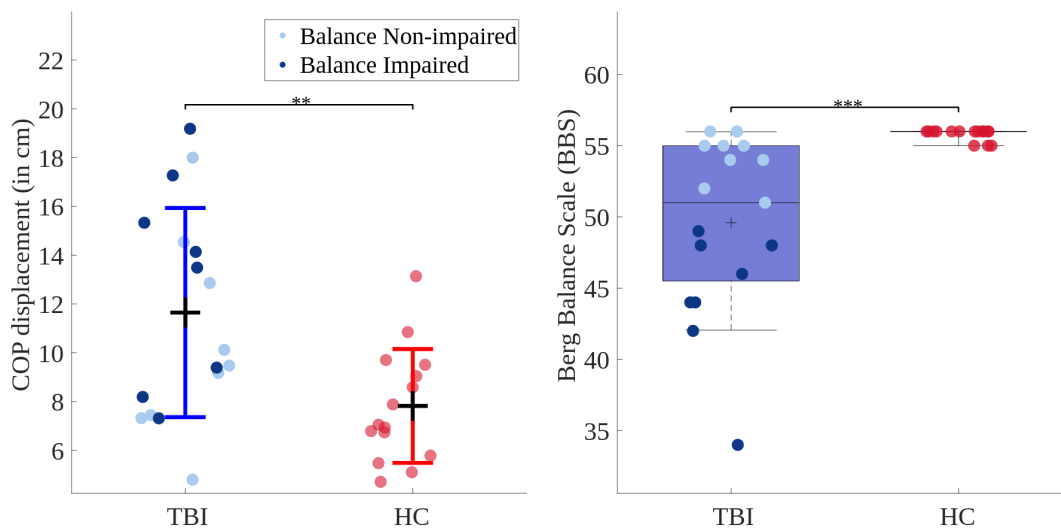

Figure 2: A group-level comparison of COP displacement (in cm) shown on the left. The black horizontal line on the COP plot marks the mean and the colored horizontal line marks the standard deviation. A group-level comparison of the Berg Balance Scale (BBS) is shown on the right as a boxplot due to its non-normal distribution. The horizontal line marks the median. The lower- and upper-hinge of the boxplot corresponds to the 25th and 75th quartile respectively. Statistical significance values are plotted as \*\*\*( $p < 0.005$ ), \*\*( $p < 0.01$ ) respectively.

233

234



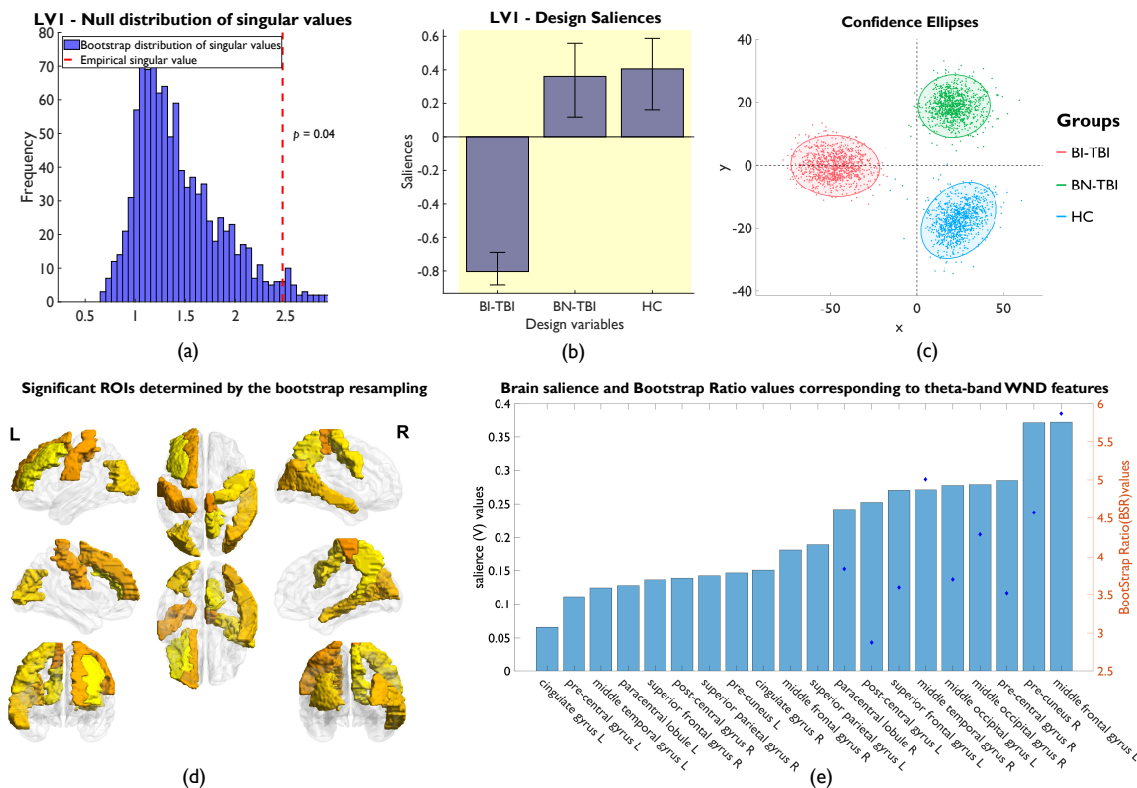

Figure 3: (a) Histogram of the singular values obtained from the first latent variable (LV1) corresponding to mean-centered PLSC. The latent variable denotes the contrast BI-TBI vs. (HC and BN-TBI). The brain imaging variable here is Theta-band weighted node degree and the design variable is the group label. The singular value obtained from the PLSC is tested for its significance using the permutation test. The red dotted line denotes the empirical singular value (statistically significant- above 95th percentile of the singular values obtained from null distribution), and the blue bar graph presents the histogram of values obtained under null distribution. (b) Design saliences ( $\mathbf{u}_1$  vector after SVD) indicate that the BI-TBI group is significantly different from BN-TBI and HC, with the error bars indicating the 95% confidence interval. The yellow background indicates robust salience values for all 3 groups. (c) 95% confidence ellipses denote a clear separation of BI-TBI from BN-TBI and HC the first latent group/contrast vector (x-direction) associated with LV1 but not so for the second latent vector (y-direction) associated with LV2 ( $p=0.93$ ). (d) Highlighted brain regions of interest for LV1 correspond to the robust variables selected based on the bootstrapping ratio (BSR) and (e) the bar graph values indicate the brain saliences ( $\mathbf{v}_1$  vector) associated with LV1 obtained from bootstrapping. The robust ROIs (Bootstrap ratio>2.5); the robust region and bootstrap values are denoted with a blue diamond mark.

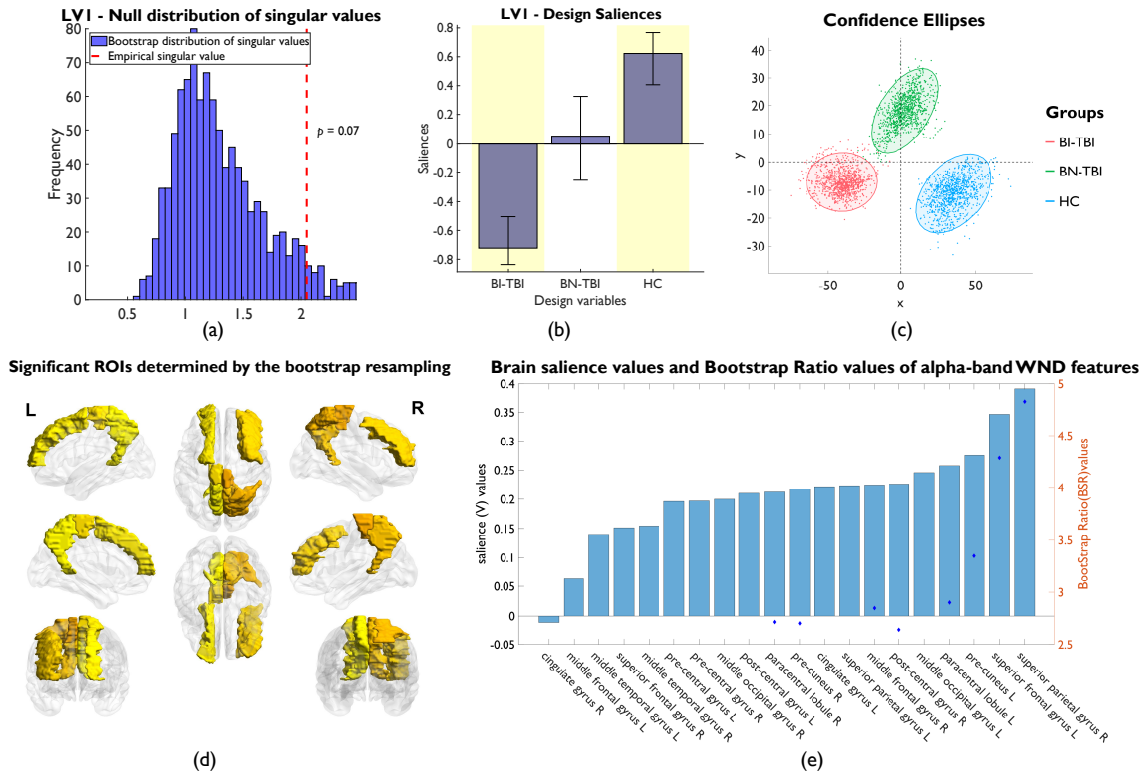

Figure 4: (a) Histogram of the singular values obtained from the first latent variable (LV1) corresponding to the contrast BI-TBI vs. (BN-TBI and HC). The brain imaging variable here is alpha-band weighted node degree and the design variable is the categorical label (mild-impaired TBI as 1, severe-impaired TBI as -1). The singular value obtained from the PLSC is tested for its significance using the permutation test. The red dotted line denotes the empirical singular value (statistically significant- above 95th percentile of the singular values obtained from null distribution), and the blue bar graph presents the histogram of values obtained under null distribution. (b) Design saliences ( $\mathbf{u}_1$ ) indicate that the BI-TBI group is significantly different from HC with the error bars indicating the 95% confidence interval of bootstrapped saliences. The yellow background indicates robust salience values for BI-TBI and HC groups but not BN-TBI. (c) Confidence ellipses clearly denote the separation between HC and BI-TBI along the dimension-1 (x-axis) associated with LV1, but not BN-TBI as its confidence ellipse is spanning both negative and positive x-values. Also, confidence ellipses for LV2 (y-axis) overlap highlight the lack of significant group separation ( $p=0.99$ ) (d) Highlighted brain regions of interest correspond to the robust variables selected based on the bootstrapping ratio (BSR) for LV1 and (e) the bar graph values indicate the brain saliences contribution ( $\mathbf{v}_1$  vector) associated with LV1 obtained from bootstrapping. The robustness of each variable is determined based on the ratio ( $>2.5$ ); the robust regions and bootstrap values are highlighted with a blue diamond mark.

### 235 3.2 Mean-centered PLSC: Weighted Node Degree features

236 Upon dichotomizing the TBI group into BI-TBI and BN-TBI based on the BBS threshold, we ran mean-  
 237 centered PLSC with 3 groups (BI-TBI, BN-TBI, and HC) as design variables, and weighted node degree  
 238 features as the brain imaging variables. We suspected that the level of balance impairment would also play  
 239 a role in identifying the discriminative neural markers. Based on this analysis framework, we observed that

240 the MC-PLSC using weighted node degree (WND) features in theta frequency band identified LV1 as a  
241 significant latent variable (out of three) that maximally differentiates the groups by contrasting BI-TBI from  
242 BN-TBI and HC together (Fig. 3(b)). The nonparametric permutation testing revealed that the empirical  
243 singular value is in the top 5 percentile of the permuted singular values (Fig. 3(a)), thus highlighting  
244 the statistical significance ( $p = 0.039$ ) of LV1. Upon bootstrap testing of this LV, 9 ROIs were found to  
245 be robustly associated with LV1 having their Bootstrap Ratio (BSR)  $> 2.5$  (Fig. 3(e)) i.e., their salience  
246 values/weighted contributions were found to be non-zero with a 99% confidence interval. The robust WND  
247 features are presented in (Fig. 3(d & e)), the regions highlighted (in the descending order of their salience  
248 values) are - left middle frontal gyrus, right precuneus, right precentral gyrus, bilateral middle occipital  
249 gyrus, right middle temporal gyrus, left superior frontal gyrus, left post-central gyrus, right paracentral  
250 lobule.

251 In a post-hoc analysis of individual group-wise contrast PLSC (i.e., one group contrast at a time - BI-TBI  
252 vs. BN-TBI, and BI-TBI vs. HC) using theta-band WND features, we noticed that the robust ROIs were, in  
253 fact, the same set of cortical regions found in the above MC-PLSC analysis (BI-TBI distinguishing BN-TBI  
254 and HC). This supports the notion that the neural substrates of balance impairment for BI-TBI could be  
255 the very same ROIs when compared to both BN-TBI and HC.

256 A similar analysis using the alpha-band WND features revealed LV1 to be significantly distinguishing BI-TBI  
257 from BN-TBI and HC (Fig. 4(b) and Fig. 4(c)). LV1 was associated with a slightly different set of robust  
258 regions based on the bootstrap ratio: left superior frontal gyrus, right postcentral gyrus, right mid frontal  
259 gyrus, right superior parietal lobule, bilateral paracentral lobules, and bilateral precuneus.

### 260 3.3 Mean-centered PLSC: Individual Connectivity Features

261 To further investigate the localized roles of individual functional connections which correlate with the contrast  
262 of different groups, we ran the MC-PLSC with the individual connectivity features (connection strength  
263 between two regions) derived from imaginary coherence in each frequency band (theta, alpha, and beta).  
264 This analysis revealed only theta-band connectivity features to be distinguishing impaired TBI from the rest  
265 (BI-TBI different from BN-TBI and HC) with a marginally significant result ( $p = 0.069$ ). The circular  
266 connectivity plot is shown in Fig. 5. Significant connections are highlighted based on the bootstrapped  
267 ratio (BSR)  $> 2.6$  suggesting that the connections have a 99% confidence level in terms of robustness to  
268 spurious connectivity features. Based on the connectivity pattern shown in Fig. 5, we observed that the  
269 distinction between the impaired and the non-impaired population (BN-TBI and HC) is reflected by weaker  
270 connections (BI-TBI  $<$  BN-TBI and HC) involving the left superior parietal lobule, left postcentral gyrus,  
271 right mid occipital gyrus, and right paracentral lobule. Most of these robust connections are associated with  
272 the sensorimotor network (postcentral gyrus, paracentral lobule, and even middle temporal gyrus) and visual  
273 network<sup>30</sup>).

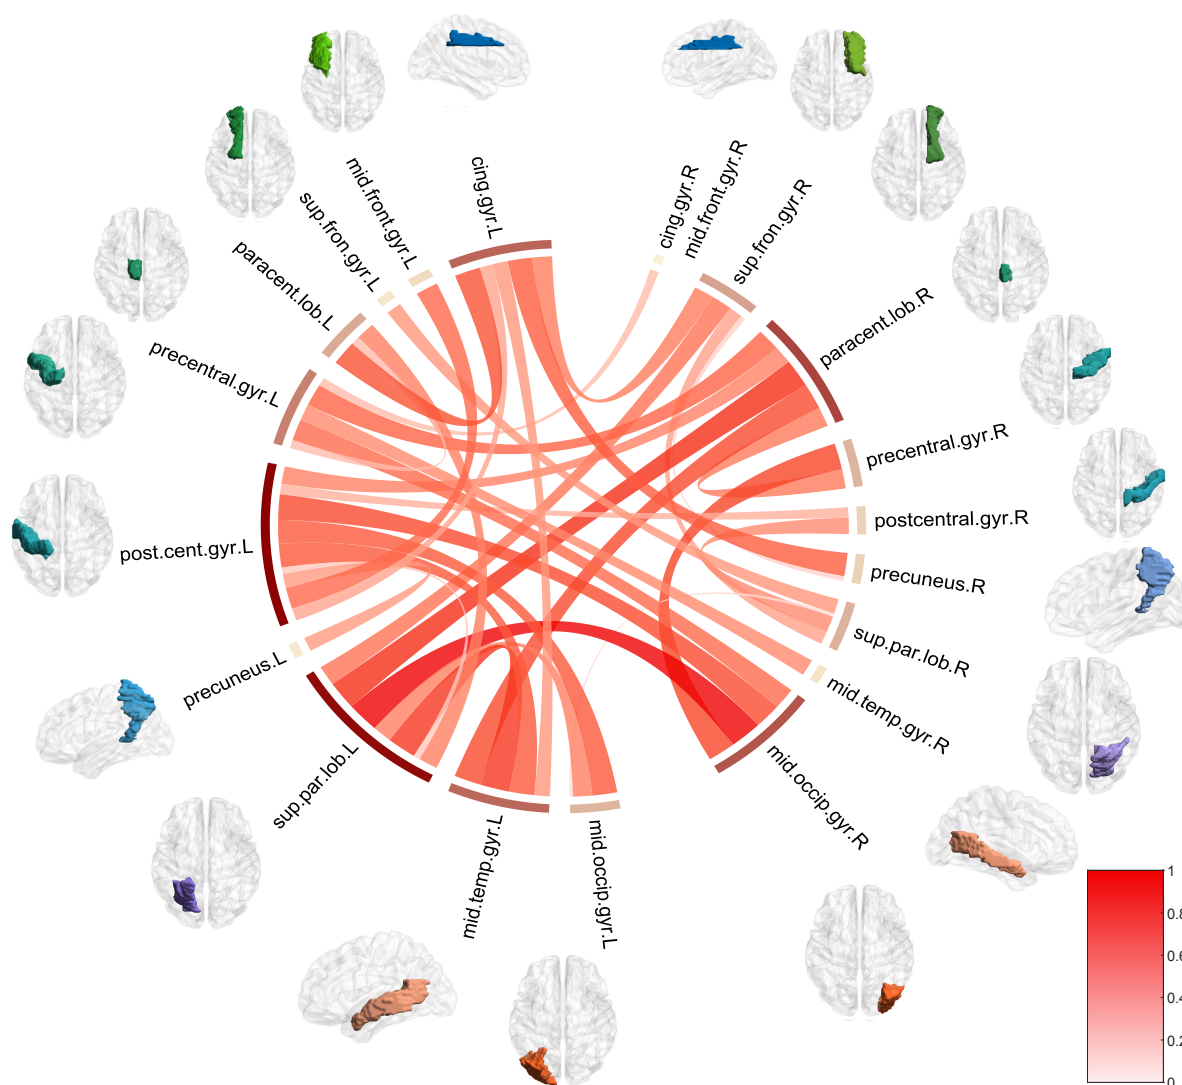

Figure 5: Visualization of robust functional connections derived from theta-band imaginary coherence based on the  $|BSR| > 2.6$ . The color of the connectivity links corresponds to the first latent variable of the brain salience matrix ( $\mathbf{v}_1$ ). The thickness of the connectivity value (between two ROIs) indicates its proportional contribution to the weighted node degree of a given ROI (thicker connection - higher proportion, thinner connection - lower proportion). The color of the sector (outer circle) indicates the absolute sum of connectivity values corresponding to a given ROI (darker color shade denotes a higher sum). The cortical ROIs are visually represented as a volumetric ROI next to the label. The circular connectivity graph is visualized using the R package *circlize* <sup>31</sup>.

## 274 4. Discussion

### 275 4.1. Disentangling the levels of balance impairment in TBIs

276 We noticed that the level of task-specific balance impairment was varied across individuals within the TBI  
277 group based on the measure of COP displacement. Although we hypothesized that the body sway during  
278 the external perturbation measured by COP displacement would be smaller in the BI-TBI group compared  
279 to the BN-TBI group, we did not see any significant differences. We suspect the reason could be that the  
280 BBS is strongly correlated with the gross functional outcome measure (such as Timed Up-and-Go) rather  
281 than the laboratory measures of body sway (measured using COP displacement). We certainly recommend  
282 future studies to investigate the association between the outcome measure specific to the experimental task  
283 and the traditional functional outcomes such as BBS and/or Balance Error Scoring System.

284 Recent literature suggests that balance complaints from chronic TBI individuals are explained more by the  
285 dysfunction of central sensory systems than the peripheral vestibular or oculomotor systems<sup>32</sup>. In the  
286 following subsections, we discuss the role of different cortical regions and functional networks in the postural  
287 control mechanisms in TBI.

288

### 289 4.2. Main PLSC findings

290 Our MC-PLSC analysis found a WND latent vector of brain regions that robustly and maximally separate  
291 the 3 groups (BI-TBI, BN-TBI, and HC) for theta and marginally so for the alpha band. The associated  
292 contrast vector for theta (Fig. 3(b)) reveals that the groups are maximally separated when contrasting BI-  
293 TBI with BN-TBI and healthy controls combined. This suggests that the theta neural response for BN-TBI  
294 is more like that of HC. But more importantly, BI-TBI individuals do present an impaired neural response  
295 (decrease in WND) to the balance perturbation, which is specific to balance impairment as measured by  
296 the BBS. This observation supports our hypothesis and rationale for separating TBIs into balance-impaired  
297 and non-impaired populations. Furthermore, this could potentially explain why in our prior analysis<sup>33</sup>, no  
298 group difference in a global measure of WND connectivity was found when contrasting HC with both BI-  
299 and BN-TBIs combined.

300 In comparison, for alpha (Fig. 4(b)) the groups are maximally separated when only contrasting BI-TBI and  
301 HC alone, excluding BN-TBI. This would suggest that BN-TBI doesn't separate well from either BI-TBI or  
302 HC. Furthermore, based on the brain and contrast saliences of this latent variable, BN-TBI shows reduced  
303 alpha WND compared to HC. However, given that BI-TBI and HC are defined both by BBS score but also  
304 the overall TBI pathology, this latent variable characterized by a reduced alpha WND in TBI may not be a  
305 specific marker of balance deficit. This is supported by the fact that no significant latent variable was found  
306 when running a post-hoc PLSC analysis between BI-TBI and BN-TBI ( $p=0.48$ ; results not shown) which  
307 are solely differentiated by their BBS impairment score.

308 Finally, similar to theta WND, our contrast analysis on individual connectivities reveals a close to a significant  
309 latent variable ( $p=0.07$ ) that best differentiates groups when contrasting BI-TBI from both BN-TBI and  
310 HC. Similarly, based on the corresponding brain and contrast salience values, BI-TBI shows reduced theta  
311 connectivities compared to HC and BN-TBI. The overall finding of theta band disconnectivity as a specific  
312 marker of balance deficit in TBI is consistent with its critical role in postural control<sup>34</sup>

### 313 4.3. Balance-related cortical regions of interest and connectivity identified by 314 PLSC:

315 The current study found that the main ROIs identified by MC-PLSC across theta- and alpha-band coherence  
316 WND features are the right paracentral lobule and precuneus, and the left superior frontal gyrus. These

317 cortical regions are associated with the sensorimotor coordination required for postural control. Specifically,  
318 the paracentral lobule processes the motor commands for balance control <sup>35</sup> after receiving the sensory  
319 inputs from the visual, vestibular, and somatosensory cortices. In the context of theta-band functional  
320 connectivity, the supplementary motor area located just in front of the paracentral lobule is associated with  
321 the pull perturbation while standing <sup>34</sup>.

322 Extending further, the entire closed-loop mechanism of balance control as coordination between several brain  
323 regions is described as the '*body schema*' in the hypothetical model <sup>36</sup>. As per this model of posture-gait  
324 control, the midbrain and subcortical regions including the cerebellum, brainstem, thalamus, and cerebral  
325 cortex receive the sensory signals from the visual cortex, vestibular cortex, and primary sensory cortex, which  
326 will then be processed by the temporoparietal cortex to construct the aforementioned *body schema*. Specif-  
327 ically, the temporoparietal cortex assists in generating motor control commands from the supplementary  
328 motor area (SMA) and premotor (PM) regions, with the help of basal ganglia and cerebellum. In our  
329 study, the middle frontal gyri which include the SMA/PM region seem to play a distinctive role in the BI-  
330 TBI group (when compared to BN-TBI and HC) as revealed by its robust bootstrap ratio in the MC-PLSC  
331 model derived from theta-band WND features. From a functional perspective, the role of middle frontal  
332 gyri in anticipated postural control is highlighted in <sup>37</sup>. Moreover, the middle frontal gyri are reported to be  
333 involved in the supraspinal motor network of stance and locomotion of walking in elderly adults <sup>38</sup>.

334 Once the sensory signals are received and processed by visual, vestibular, and somatosensory cortices, the  
335 motor commands for balance control are processed by the paracentral lobule and precentral gyrus <sup>39</sup> which  
336 constitutes the leg region of the M1. In the framework of the posture-gait control model mentioned in <sup>36</sup>,  
337 we believe that the superior parietal region is involved in anticipatory postural adjustment as it detects  
338 postural instability <sup>40</sup>. Along the same line of discussion, our findings of theta-band coherence-based  
339 individual connectivity features show that significant functional connections are associated with the left  
340 superior parietal lobule in addition to the right paracentral lobule and left postcentral gyrus. Based on  
341 the role of the cingulate and angular gyrus in the dynamic regulation of attention to unpredictable events  
342 presented in <sup>41</sup>, and their anatomical relation with the basal ganglia and cerebellum, we expect that the  
343 postural control signals generated by the motor regions are passed to the cortico-reticular and reticulospinal  
344 tracts via cingulate gyrus.

345 In terms of the visual perception of the balance perturbation, we anticipate the regions around the occipital  
346 lobe will play an integral role in the visual perception of static vs. dynamic motion (or tilt) of the posturog-  
347 raphy platform based on the report of an Activation Likelihood Estimation (ALE) meta-analysis article <sup>42</sup>.  
348 Along this line of discussion, we believe the middle occipital gyrus identified by the theta-band WND features  
349 in our study may play a critical role in the sensory integration of visual and motor functions <sup>43</sup>. Moreover,  
350 the activation of middle temporal gyri has been reported in the simulation (or imagination) of a postural  
351 control study <sup>44,45</sup>, wherein the activated areas were shown to be in close proximity to the PIVC (parietal  
352 insular vestibular cortex) - a region that is generally regarded as responsible for processing the vestibular  
353 signals related to the postural control <sup>36</sup>.

#### 354 4.4. Roles of different functional networks identified by PLSC

355 For qualitative assessment of our findings, we now discuss the roles of functional networks to which the  
356 aforementioned ROIs belong.

357 Although it is not trivial to assign the anatomical ROIs to specific functional networks, a recent study  
358 has tested the spatial correspondence between the anatomical regions (based on the Desikan-Killiany atlas)  
359 and functional networks (based on the Yeo-Atlas) <sup>46</sup>. The permutation testing of the normalized mutual  
360 information showed that the hypothesized overlap between the functional networks and anatomical ROIs  
361 was not due to random chance. In other words, the nonparametric testing supported the evidence that  
362 the functional networks and anatomical ROIs have good spatial correspondence. Motivated by this idea, we  
363 wanted to explore the role of the significant ROIs returned by the PLSC analysis in the context of functional



364 networks involved in postural control. In this regard, our focus is mainly on the two intrinsic functional  
365 networks: the sensorimotor network (SMN) and the visual network (VN), as these networks showed high  
366 spatial correspondence with the motor and visual areas as per the Desikan Killiany Atlas<sup>46</sup>. Not surprisingly,  
367 the sensorimotor network (SMN) is reported to play the most critical role during postural control mechanisms  
368 by facilitating sensorimotor integration<sup>47</sup>. While the roles of different regions within the SMN are widely  
369 studied in the context of postural control<sup>48,39,37</sup>, the network-level mechanisms are not well studied in the  
370 TBI population. Our study shows preliminary evidence that the functional connectivity network strength of  
371 the SMN comprising bilateral paracentral lobule is associated with distinguishing the balance-impaired TBI  
372 from balance non-impaired TBI and healthy controls. We also noticed the strongest connectivity feature  
373 associated with the Middle Occipital Gyrus (MOG) and the left superior parietal lobule (SPL) (Fig. 5).  
374 This finding corroborates those of<sup>49</sup> focused on the neuroimaging of normal and precision gait, where, it  
375 was shown that the precise spatial control of the gait depends on the functional interactions between the  
376 MOG (part of the visual network) and SPL<sup>30</sup>. Also, the connectivity between MOG and SPL is expected  
377 to be involved in the visuospatial perception<sup>50</sup>. With regard to the functional networks, SPL is considered  
378 a core region of the *dorsal attention network* (DAN), which is generally preactivated during the anticipatory  
379 movement which will subsequently predict performance to upcoming targets. Also, under certain conditions,  
380 the preparatory activation of the DAN will extend to the visual cortex reflecting the top-down mechanism  
381 of sensory control.

## 382 4.5. Limitations

383 We acknowledge there are several limitations of our study. First, our sample size is relatively small for  
384 stratified analysis. Based on our observations, we suggest the future study design of postural control tasks  
385 in TBI must take into account the level of impairment (e.g. Berg Balance Scale or Balance Error Scoring  
386 System) and not just the level of severity (mild/moderate/severe) based on Glasgow Coma Scale at the time  
387 of injury. Moreover, we did not study the task-specific activity of deep sub-cortical neural substrates such  
388 as the brainstem, basal ganglia, and pedunculo-pontine nucleus which are involved in the postural control<sup>35</sup>  
389 given the limited accuracy of EEG source localization of subcortical structures.

## 390 Conclusion

391 In this study, we present for the first time, a stratified analysis of balance deficits in TBI by studying  
392 the brain connectivity features pertaining to the balance perturbation task. As the heterogeneity in TBI  
393 poses the challenge in identifying robust brain imaging features correlated with the impairment, we used a  
394 multivariate statistical framework based on the partial least squares correlation. We made several interesting  
395 observations including, (1) COP displacement - an outcome measure of balance control did not seem to  
396 distinguish the balance-impaired TBI from non-impaired TBI as we observed in the case of BBS; (2) The  
397 MC-PLSC algorithm with the theta-band functional connectivity network strength of selected anatomical  
398 regions as the brain imaging features showed specific ROIs that distinguished BI-TBI from BN-TBIs and HC.  
399 These selected regions namely- paracentral lobules, precuneus, superior parietal lobule, superior frontal gyrus  
400 play a critical role in postural control; (3) The MC-PLSC algorithm with individual functional connectivity  
401 values as imaging features revealed that the weaker functional connections in BI-TBI (compared to BN-  
402 TBI and HC) linked to the leg motor region (paracentral lobule) may be indicative of maladaptive balance  
403 performance. Understanding the role of key regions of interest may help in designing novel therapeutic  
404 interventions (e.g., neuromodulation and/or goal-directed movement therapies) for improving the balance  
405 functions in TBI.

## References

- 406
- 407 1. Thompson, H. J., McCormick, W. C. & Kagan, S. H. Traumatic brain injury in older adults: epidemiology,  
408 outcomes, and future implications. *Journal of the American Geriatrics Society* **54**, 1590–1595 (2006).
  - 409 2. Pickett, T. C. Objectively assessing balance deficits after TBI: Role of computerized posturography. *The*  
410 *Journal of Rehabilitation Research and Development* **44**, 983–990 (2007).
  - 411 3. Fino, P. C. *et al.*. Assessment and rehabilitation of central sensory impairments for balance in mTBI using  
412 auditory biofeedback: a randomized clinical trial. *BMC Neurology* **17**, (2017).
  - 413 4. Calzolari, E. *et al.*. Vestibular agnosia in traumatic brain injury and its link to imbalance. *Brain* **144**,  
414 128–143 (2020).
  - 415 5. Wang, B. *et al.*. Posture-related changes in brain functional connectivity as assessed by wavelet phase  
416 coherence of NIRS signals in elderly subjects. *Behavioural Brain Research* **312**, 238–245 (2016).
  - 417 6. Varghese, J. P., Staines, W. R. & McIlroy, W. E. Activity in Functional Cortical Networks Temporally  
418 Associated with Postural Instability. *Neuroscience* **401**, 43–58 (2019).
  - 419 7. Caeyenberghs, K. *et al.*. Brain connectivity and postural control in young traumatic brain injury patients:  
420 A diffusion MRI based network analysis. *NeuroImage: Clinical* **1**, 106–115 (2012).
  - 421 8. Caeyenberghs, K. *et al.*. Brain-behavior relationships in young traumatic brain injury patients: DTI  
422 metrics are highly correlated with postural control. *Human Brain Mapping* **31**, 992–1002 (2009).
  - 423 9. Han, K., Chapman, S. B. & Krawczyk, D. C. Disrupted Intrinsic Connectivity among Default Dorsal  
424 Attention, and Frontoparietal Control Networks in Individuals with Chronic Traumatic Brain Injury. *Journal*  
425 *of the International Neuropsychological Society* **22**, 263–279 (2016).
  - 426 10. Woytowicz, E. J., Sours, C., Gullapalli, R. P., Rosenberg, J. & Westlake, K. P. Modulation of working  
427 memory load distinguishes individuals with and without balance impairments following mild traumatic brain  
428 injury. *Brain Injury* **32**, 191–199 (2017).
  - 429 11. Churchill, N. W., Hutchison, M. G., Graham, S. J. & Schweizer, T. A. Connectomic markers of symptom  
430 severity in sport-related concussion: Whole-brain analysis of resting-state fMRI. *NeuroImage: Clinical* **18**,  
431 518–526 (2018).
  - 432 12. Handiru, V. S. *et al.*. Graph-theoretical Analysis of EEG Functional Connectivity during Balance Per-  
433 turbation in Traumatic Brain Injury: A Pilot Study. (2020) doi:10.1101/2020.10.08.332353.
  - 434 13. Stevenson, T. J., Connelly, D. M., Murray, J. M., Huggett, D. & Overend, T. Threshold Berg Balance  
435 Scale Scores for Gait-Aid Use in Elderly Subjects: A Secondary Analysis. *Physiotherapy Canada* **62**, 133–140  
436 (2010).
  - 437 14. Chang, C.-Y., Hsu, S.-H., Pion-Tonachini, L. & Jung, T.-P. Evaluation of Artifact Subspace Reconstruc-  
438 tion for Automatic Artifact Components Removal in Multi-Channel EEG Recordings. *IEEE Transactions*  
439 *on Biomedical Engineering* **67**, 1114–1121 (2020).
  - 440 15. Makeig, S., Bell, A. J., Jung, T.-ping & Sejnowski, T. J. Independent Component Analysis of Electroen-  
441 cephalographic Data. in *Advances in Neural Information Processing Systems* **8** (1996).
  - 442 16. Pion-Tonachini, L., Kreutz-Delgado, K. & Makeig, S. ICLabel: An automated electroencephalographic  
443 independent component classifier, dataset, and website.. *Neuroimage* **198**, 181–197 (2019).
  - 444 17. Handiru, V. S., Vinod, A. P. & Guan, C. EEG Source Imaging of Movement Decoding: The State of the  
445 Art and Future Directions. *IEEE Systems Man, and Cybernetics Magazine* **4**, 14–23 (2018).
  - 446 18. Gramfort, A., Papadopoulos, T., Olivi, E. & Clerc, M. OpenMEEG: opensource software for quasistatic  
447 bioelectromagnetics. *BioMedical Engineering OnLine* **9**, 45 (2010).

- 448 19. Tadel, F., Baillet, S., Mosher, J. C., Pantazis, D. & Leahy, R. M. Brainstorm: A User-Friendly Application  
449 for MEG/EEG Analysis. *Computational Intelligence and Neuroscience* **2011**, 1–13 (2011).
- 450 20. Fuchs, M., Drenckhahn, R., Wischmann, H. & Wagner, M. An improved boundary element method for  
451 realistic volume-conductor modeling. *IEEE Transactions on Biomedical Engineering* **45**, 980–997 (1998).
- 452 21. Pascual-Marqui, R. D. Standardized low-resolution brain electromagnetic tomography (sLORETA): tech-  
453 nical details.. *Methods Find Exp Clin Pharmacol* **24 Suppl D**, 5–12 (2002).
- 454 22. Shattuck, D. W. & Leahy, R. M. BrainSuite: An automated cortical surface identification tool. *Medical*  
455 *Image Analysis* **6**, 129–142 (2002).
- 456 23. Nolte, G. *et al.*. Identifying true brain interaction from EEG data using the imaginary part of coherency.  
457 *Clinical Neurophysiology* **115**, 2292–2307 (2004).
- 458 24. McIntosh, A. R. & Lobaugh, N. J. Partial least squares analysis of neuroimaging data: Applications and  
459 advances. *NeuroImage* **23**, 250–263 (2004).
- 460 25. Krishnan, A., Williams, L. J., McIntosh, A. R. & Abdi, H. Partial Least Squares (PLS) methods for  
461 neuroimaging: A tutorial and review. *NeuroImage* **56**, 455–475 (2011).
- 462 26. Abdi, H. *et al.*. Multiple Subject Barycentric Discriminant Analysis (MUSUBADA): How to Assign Scans  
463 to Categories without Using Spatial Normalization. *Computational and Mathematical Methods in Medicine*  
464 **2012**, 1–15 (2012).
- 465 27. Milan, L. & Whittaker, J. Application of the Parametric Bootstrap to Models that Incorporate a Singular  
466 Value Decomposition. *Applied Statistics* **44**, 31 (1995).
- 467 28. Berg, K. O., Maki, B. E., Williams, J. I., Holliday, P. J. & Wood-Dauphinee, S. L. Clinical and laboratory  
468 measures of postural balance in an elderly population.. *Arch Phys Med Rehabil* **73**, 1073–80 (1992).
- 469 29. Shenoy, H. V. *et al.*. Graph-theoretical analysis of EEG functional connectivity during balance perturba-  
470 tion in traumatic brain injury: A pilot study.. *Hum Brain Mapp* **42**, 4427–4447 (2021).
- 471 30. Uddin, L. Q., Yeo, B. T. T. & Spreng, R. N. Towards a Universal Taxonomy of Macro-scale Functional  
472 Human Brain Networks. *Brain Topography* **32**, 926–942 (2019).
- 473 31. Gu, Z., Gu, L., Eils, R., Schlesner, M. & Brors, B. circlize implements and enhances circular visualization  
474 in R. *Bioinformatics* **30**, 2811–2812 (2014).
- 475 32. Campbell, K. R. *et al.*. Exploring persistent complaints of imbalance after mTBI: Oculomotor pe-  
476 ripheral vestibular and central sensory integration function. *Journal of Vestibular Research* 1–12 (2021)  
477 doi:10.3233/ves-201590.
- 478 33. Shenoy, H. V. *et al.*. Graph-theoretical analysis of EEG functional connectivity during balance perturba-  
479 tion in traumatic brain injury: A pilot study.. *Hum Brain Mapp* **42**, 4427–4447 (2021).
- 480 34. Peterson, S. M. & Ferris, D. P. Group-level cortical and muscular connectivity during perturbations to  
481 walking and standing balance. *NeuroImage* **198**, 93–103 (2019).
- 482 35. Boisgontier, M. P. *et al.*. Individual differences in brainstem and basal ganglia structure predict postural  
483 control and balance loss in young and older adults. *Neurobiology of Aging* **50**, 47–59 (2017).
- 484 36. Takakusaki, K. Functional Neuroanatomy for Posture and Gait Control. *Journal of Movement Disorders*  
485 **10**, 1–17 (2017).
- 486 37. Mihara, M., Miyai, I., Hatakenaka, M., Kubota, K. & Sakoda, S. Role of the prefrontal cortex in human  
487 balance control. *NeuroImage* **43**, 329–336 (2008).
- 488 38. Zwergal, A. *et al.*. Aging of human supraspinal locomotor and postural control in fMRI. *Neurobiology of*  
489 *Aging* **33**, 1073–1084 (2012).

- 490 39. Taubert, M., Mehnert, J., Pleger, B. & Villringer, A. Rapid and specific gray matter changes in M1  
491 induced by balance training. *NeuroImage* **133**, 399–407 (2016).
- 492 40. Slobounov, S., Wu, T. & Hallett, M. Neural basis subserving the detection of postural instability: an  
493 fMRI study. *Motor Control* **10**, 69–89 (2006).
- 494 41. Hahn, B., Ross, T. J. & Stein, E. A. Cingulate Activation Increases Dynamically with Response Speed  
495 under Stimulus Unpredictability. *Cerebral Cortex* **17**, 1664–1671 (2006).
- 496 42. Dijkstra, B. W. *et al.* Functional neuroimaging of human postural control: A systematic review with  
497 meta-analysis. *Neuroscience & Biobehavioral Reviews* **115**, 351–362 (2020).
- 498 43. MacKinnon, C. D. Sensorimotor anatomy of gait balance, and falls. in *Handbook of Clinical Neurology*  
499 3–26 (Elsevier, 2018). doi:10.1016/b978-0-444-63916-5.00001-x.
- 500 44. Jahn, K. *et al.* Brain activation patterns during imagined stance and locomotion in functional magnetic  
501 resonance imaging. *NeuroImage* **22**, 1722–1731 (2004).
- 502 45. Karim, H. T. *et al.* Functional MR imaging of a simulated balance task. *Brain Research* **1555**, 20–27  
503 (2014).
- 504 46. Alexander-Bloch, A. F. *et al.* On testing for spatial correspondence between maps of human brain  
505 structure and function. *NeuroImage* **178**, 540–551 (2018).
- 506 47. Peterka, R. J. & Loughlin, P. J. Dynamic Regulation of Sensorimotor Integration in Human Postural  
507 Control. *Journal of Neurophysiology* **91**, 410–423 (2004).
- 508 48. Goble, D. J. *et al.* Brain Activity during Ankle Proprioceptive Stimulation Predicts Balance Performance  
509 in Young and Older Adults. *Journal of Neuroscience* **31**, 16344–16352 (2011).
- 510 49. Bakker, M. *et al.* Cerebral correlates of motor imagery of normal and precision gait. *NeuroImage* **41**,  
511 998–1010 (2008).
- 512 50. Johns, P. *Functional neuroanatomy*. *Clinical Neuroscience* 27–47 (Elsevier, 2014). doi:10.1016/b978-0-  
513 443-10321-6.00003-5.
